# Supplementary material
Source: PubMed Central journal article supplement (PMC4732964)
Supplement: supp_150669_150669-dec-at-1.pdf [file supp_150669_150669-dec-at-1.pdf]

| <b>Appendix 1 (as supplied by the authors): Characteristics of various forms of mercury<sup>1</sup></b> |                                                                                                |                     |                  |                                                                                                   |                         |                                  |
|---------------------------------------------------------------------------------------------------------|------------------------------------------------------------------------------------------------|---------------------|------------------|---------------------------------------------------------------------------------------------------|-------------------------|----------------------------------|
| Form                                                                                                    | Source(s)                                                                                      | Route of Exposure   | Target Organ(s)  | Signs/Symptoms                                                                                    | Major Excretory Pathway | Approximate Biological Half-Life |
| Elemental (Hg <sup>0</sup> )                                                                            | Occupational<br>Dental amalgam                                                                 | Inhalation (vapour) | CNS, PNS, kidney | insomnia, anxiety, tremor, peripheral neuropathy, nephropathy                                     | Urine and feces         | 60 days                          |
| Inorganic Hg salts                                                                                      | Topical antiseptics through disrupted skin/tissues                                             | Ingestion, dermal   | Gut, kidney      | Nausea, vomiting (ingestion) nephropathy                                                          | Urine and feces         | 40 days                          |
| Methyl Hg                                                                                               | Diet (fish), most notably large predatory fish (e.g., large tuna, swordfish, shark, tile fish) | Ingestion           | CNS              | perioral paresthesia, constriction of visual fields, dysarthria, ataxia, impaired hearing, tremor | Feces                   | 40–70 days                       |
| Note: CNS = central nervous system, PNS = peripheral nervous system.                                    |                                                                                                |                     |                  |                                                                                                   |                         |                                  |

## Reference

1. Clarkson TW, Magos L, Myers GJ. The toxicology of mercury — current exposures and clinical manifestations. *N Engl J Med* 2003;349:1731-7.
